# Supplementary material for: Oxygenated Polyketides from Plakinastrella mamillaris as a New Chemotype of PXR Agonists
Source: MDPI journal article supplement (doi:10.3390/md11072314), 2013-07-02
Supplement: s1 [file s1]

marinedrugs-11-02314-s001.mol
  corina  04141405263D 1   1.00000     0.00000 
CORINA 3.49 0023  12.04.2013
 24 26  0  0  0  0  0  0  0  0999 V2000
    0.0559    1.3389    0.1243 C   0  0  0  0  0  0  0  0  0  0  0  0
    0.2871   -0.1881    0.0245 C   0  0  0  0  0  0  0  0  0  0  0  0
    1.6092   -0.3351   -0.5694 O   0  0  0  0  0  0  0  0  0  0  0  0
    2.3782    0.7036   -0.1775 C   0  0  0  0  0  0  0  0  0  0  0  0
    1.4920    1.9140    0.0060 C   0  0  0  0  0  0  0  0  0  0  0  0
   -0.5964    1.7501   -1.2161 C   0  0  0  0  0  0  0  0  0  0  0  0
   -1.0947    0.4670   -1.8949 C   0  0  0  0  0  0  0  0  0  0  0  0
   -0.7851   -0.7011   -0.9483 C   0  0  0  0  0  0  0  0  0  0  0  0
    3.7089    0.6669    0.0171 C   0  0  0  0  0  0  0  0  0  0  0  0
    4.4050   -0.5618   -0.0812 C   0  0  0  0  0  0  0  0  0  0  0  0
    5.7395   -0.5987    0.1140 O   0  0  0  0  0  0  0  0  0  0  0  0
    6.3771   -1.8724   -0.0005 C   0  0  0  0  0  0  0  0  0  0  0  0
    0.5449    2.3239   -2.0330 C   0  0  0  0  0  0  0  0  0  0  0  0
    1.4993    2.7411   -1.1868 O   0  0  0  0  0  0  0  0  0  0  0  0
    0.5880    2.3928   -3.2385 O   0  0  0  0  0  0  0  0  0  0  0  0
    3.7998   -1.5847   -0.3416 O   0  0  0  0  0  0  0  0  0  0  0  0
    0.2033   -0.8662    1.3935 C   0  0  0  0  0  0  0  0  0  0  0  0
    1.8826    2.7080    1.2541 C   0  0  0  0  0  0  0  0  0  0  0  0
   -1.4038    2.4674   -1.0694 H   0  0  0  0  0  0  0  0  0  0  0  0
   -2.6033    0.5571   -2.1337 C   0  0  0  0  0  0  0  0  0  0  0  0
   -3.0692   -0.6694   -2.9207 C   0  0  0  0  0  0  0  0  0  0  0  0
    0.4390   -2.3694    1.2333 C   0  0  0  0  0  0  0  0  0  0  0  0
    0.9585    3.9189    1.3982 C   0  0  0  0  0  0  0  0  0  0  0  0
   -0.4844    1.6542    1.0169 H   0  0  0  0  0  0  0  0  0  0  0  0
  1  2  1  0      
  2  3  1  0      
  3  4  1  0      
  4  5  1  0      
  5  1  1  0      
  1  6  1  0      
  6  7  1  0      
  7  8  1  0      
  8  2  1  0      
  4  9  2  0      
  9 10  1  0      
 10 11  1  0      
 11 12  1  0      
  6 13  1  0      
 13 14  1  0      
 13 15  2  0      
 10 16  2  0      
  5 14  1  0      
  2 17  1  0      
  5 18  1  0      
  6 19  1  0      
  7 20  1  0      
 20 21  1  0      
 17 22  1  0      
 18 23  1  0      
  1 24  1  0      
M  END
$$$$
