# Supplementary material for: Oxygenated Polyketides from Plakinastrella mamillaris as a New Chemotype of PXR Agonists
Source: MDPI journal article supplement (doi:10.3390/md11072314), 2013-07-02
Supplement: s2 [file s2]

marinedrugs-11-02314-s001.mol
  ChemDraw01201408352D

 24 26  0  0  0  0  0  0  0  0999 V2000
   -0.6085    0.3705    0.0000 C   0  0  0  0  0  0  0  0  0  0  0  0
   -0.6085   -0.4545    0.0000 C   0  0  0  0  0  0  0  0  0  0  0  0
    0.1762   -0.7095    0.0000 O   0  0  0  0  0  0  0  0  0  0  0  0
    0.6611   -0.0420    0.0000 C   0  0  0  0  0  0  0  0  0  0  0  0
    0.1762    0.6254    0.0000 C   0  0  0  0  0  0  0  0  0  0  0  0
   -1.3931    0.6254    0.0000 C   0  0  0  0  0  0  0  0  0  0  0  0
   -1.8780   -0.0420    0.0000 C   0  0  0  0  0  0  0  0  0  0  0  0
   -1.3931   -0.7095    0.0000 C   0  0  0  0  0  0  0  0  0  0  0  0
    1.4861   -0.0420    0.0000 C   0  0  0  0  0  0  0  0  0  0  0  0
    1.8986   -0.7565    0.0000 C   0  0  0  0  0  0  0  0  0  0  0  0
    2.7236   -0.7565    0.0000 O   0  0  0  0  0  0  0  0  0  0  0  0
    3.3069   -1.3399    0.0000 C   0  0  0  0  0  0  0  0  0  0  0  0
   -1.3931    1.4504    0.0000 C   0  0  0  0  0  0  0  0  0  0  0  0
   -0.5962    1.6639    0.0000 O   0  0  0  0  0  0  0  0  0  0  0  0
   -2.1076    1.8629    0.0000 O   0  0  0  0  0  0  0  0  0  0  0  0
    1.4861   -1.4710    0.0000 O   0  0  0  0  0  0  0  0  0  0  0  0
   -0.6085   -1.2795    0.0000 C   0  0  0  0  0  0  0  0  0  0  0  0
    0.8906    1.0379    0.0000 C   0  0  0  0  0  0  0  0  0  0  0  0
   -2.1076    1.0379    0.0000 H   0  0  0  0  0  0  0  0  0  0  0  0
   -2.5925    0.3705    0.0000 C   0  0  0  0  0  0  0  0  0  0  0  0
   -3.3069   -0.0420    0.0000 C   0  0  0  0  0  0  0  0  0  0  0  0
   -0.0251   -1.8629    0.0000 C   0  0  0  0  0  0  0  0  0  0  0  0
    1.1042    1.8348    0.0000 C   0  0  0  0  0  0  0  0  0  0  0  0
   -0.6440    0.9947    0.0000 H   0  0  0  0  0  0  0  0  0  0  0  0
  1  2  1  0      
  2  3  1  0      
  3  4  1  0      
  4  5  1  0      
  5  1  1  0      
  1  6  1  0      
  6  7  1  0      
  7  8  1  0      
  8  2  1  0      
  4  9  2  0      
  9 10  1  0      
 10 11  1  0      
 11 12  1  0      
  6 13  1  0      
 13 14  1  0      
 13 15  2  0      
 10 16  2  0      
  5 14  1  6      
  2 17  1  1      
  5 18  1  1      
  6 19  1  1      
  7 20  1  1      
 20 21  1  0      
 17 22  1  0      
 18 23  1  0      
  1 24  1  1      
M  END
