# Supplementary material for: Oxygenated Polyketides from Plakinastrella mamillaris as a New Chemotype of PXR Agonists
Source: MDPI journal article supplement (doi:10.3390/md11072314), 2013-07-02
Supplement: s3 [file s3]

marinedrugs-11-02314-s002.mol
  corina  04141405263D 1   1.00000     0.00000 
CORINA 3.49 0023  12.04.2013
 20 22  0  0  0  0  0  0  0  0999 V2000
   -0.0189    1.5436    0.0105 C   0  0  0  0  0  0  0  0  0  0  0  0
    0.0021   -0.0041    0.0020 C   0  0  0  0  0  0  0  0  0  0  0  0
    1.3358   -0.3631   -0.4612 O   0  0  0  0  0  0  0  0  0  0  0  0
    2.2051    0.5765   -0.0491 C   0  0  0  0  0  0  0  0  0  0  0  0
    1.4896    1.9068   -0.0019 C   0  0  0  0  0  0  0  0  0  0  0  0
   -0.4904    1.9616   -1.4016 C   0  0  0  0  0  0  0  0  0  0  0  0
   -1.1062    0.7215   -2.0639 C   0  0  0  0  0  0  0  0  0  0  0  0
   -1.0456   -0.4211   -1.0407 C   0  0  0  0  0  0  0  0  0  0  0  0
    0.7858    2.3247   -2.1356 C   0  0  0  0  0  0  0  0  0  0  0  0
    1.7150    2.6547   -1.2253 O   0  0  0  0  0  0  0  0  0  0  0  0
    0.9397    2.3175   -3.3340 O   0  0  0  0  0  0  0  0  0  0  0  0
   -0.2913   -0.5844    1.3870 C   0  0  0  0  0  0  0  0  0  0  0  0
    1.8837    2.7095    1.2396 C   0  0  0  0  0  0  0  0  0  0  0  0
   -1.1975    2.7902   -1.3629 H   0  0  0  0  0  0  0  0  0  0  0  0
   -2.5613    1.0032   -2.4435 C   0  0  0  0  0  0  0  0  0  0  0  0
   -3.1281   -0.1915   -3.2131 C   0  0  0  0  0  0  0  0  0  0  0  0
   -0.2573   -2.1124    1.3173 C   0  0  0  0  0  0  0  0  0  0  0  0
    3.3871    2.9915    1.2085 C   0  0  0  0  0  0  0  0  0  0  0  0
   -0.5823    1.9813    0.8346 H   0  0  0  0  0  0  0  0  0  0  0  0
    3.3640    0.3884    0.2364 O   0  0  0  0  0  0  0  0  0  0  0  0
  1  2  1  0      
  2  3  1  0      
  3  4  1  0      
  4  5  1  0      
  5  1  1  0      
  1  6  1  0      
  6  7  1  0      
  7  8  1  0      
  8  2  1  0      
  6  9  1  0      
  9 10  1  0      
  9 11  2  0      
  5 10  1  0      
  2 12  1  0      
  5 13  1  0      
  6 14  1  0      
  7 15  1  0      
 15 16  1  0      
 12 17  1  0      
 13 18  1  0      
  1 19  1  0      
  4 20  2  0      
M  END
$$$$
