# Supplementary material for: Oxygenated Polyketides from Plakinastrella mamillaris as a New Chemotype of PXR Agonists
Source: MDPI journal article supplement (doi:10.3390/md11072314), 2013-07-02
Supplement: s5 [file s5]

marinedrugs-11-02314-s003.mol
  corina  04141405263D 1   1.00000     0.00000 
CORINA 3.49 0023  12.04.2013
 27 29  0  0  0  0  0  0  0  0999 V2000
   -0.0497    1.5460    0.0109 C   0  0  0  0  0  0  0  0  0  0  0  0
   -0.0650    0.0065    0.0012 C   0  0  0  0  0  0  0  0  0  0  0  0
    1.2842   -0.3953    0.3793 O   0  0  0  0  0  0  0  0  0  0  0  0
    2.1555    0.5468   -0.0349 C   0  0  0  0  0  0  0  0  0  0  0  0
    1.4609    1.8960   -0.0061 C   0  0  0  0  0  0  0  0  0  0  0  0
   -0.5598    2.0127   -1.3748 C   0  0  0  0  0  0  0  0  0  0  0  0
   -0.3476    0.8156   -2.3163 C   0  0  0  0  0  0  0  0  0  0  0  0
   -0.3579   -0.4406   -1.4350 C   0  0  0  0  0  0  0  0  0  0  0  0
    0.4799    3.1061   -1.7353 C   0  0  0  0  0  0  0  0  0  0  0  0
    1.7246    2.5586   -1.2567 O   0  0  0  0  0  0  0  0  0  0  0  0
    0.5328    3.3209   -3.2493 C   0  0  0  0  0  0  0  0  0  0  0  0
   -1.1010   -0.5431    0.9838 C   0  0  0  0  0  0  0  0  0  0  0  0
    1.8736    2.7305    1.2081 C   0  0  0  0  0  0  0  0  0  0  0  0
   -1.5898    2.3691   -1.3600 H   0  0  0  0  0  0  0  0  0  0  0  0
   -1.4819    0.7468   -3.3407 C   0  0  0  0  0  0  0  0  0  0  0  0
   -1.3264   -0.5165   -4.1897 C   0  0  0  0  0  0  0  0  0  0  0  0
   -1.0825   -2.0724    0.9420 C   0  0  0  0  0  0  0  0  0  0  0  0
    3.3798    2.9945    1.1574 C   0  0  0  0  0  0  0  0  0  0  0  0
   -0.5892    1.9808    0.8524 H   0  0  0  0  0  0  0  0  0  0  0  0
    3.4283    0.3273   -0.4115 C   0  0  0  0  0  0  0  0  0  0  0  0
    3.9554   -0.9864   -0.3929 C   0  0  0  0  0  0  0  0  0  0  0  0
    5.2319   -1.2066   -0.7705 O   0  0  0  0  0  0  0  0  0  0  0  0
    5.6976   -2.5568   -0.7270 C   0  0  0  0  0  0  0  0  0  0  0  0
    3.2574   -1.9170   -0.0363 O   0  0  0  0  0  0  0  0  0  0  0  0
    1.4449    4.5081   -3.5645 C   0  0  0  0  0  0  0  0  0  0  0  0
   -0.7829    3.5879   -3.7387 O   0  0  0  0  0  0  0  0  0  0  0  0
    0.9099    0.9349   -2.9844 O   0  0  0  0  0  0  0  0  0  0  0  0
  1  2  1  0      
  2  3  1  0      
  3  4  1  0      
  4  5  1  0      
  5  1  1  0      
  1  6  1  0      
  6  7  1  0      
  7  8  1  0      
  8  2  1  0      
  6  9  1  0      
  9 11  1  0      
  5 10  1  0      
  2 12  1  0      
  5 13  1  0      
  6 14  1  0      
  7 15  1  0      
 15 16  1  0      
 12 17  1  0      
 13 18  1  0      
  1 19  1  0      
  4 20  2  0      
 20 21  1  0      
 21 22  1  0      
 22 23  1  0      
 21 24  2  0      
  9 10  1  0      
 11 25  1  0      
 11 26  1  0      
  7 27  1  0      
M  END
$$$$
