# Supplementary material for: Oxygenated Polyketides from Plakinastrella mamillaris as a New Chemotype of PXR Agonists
Source: MDPI journal article supplement (doi:10.3390/md11072314), 2013-07-02
Supplement: s6 [file s6]

marinedrugs-11-02314-s003.mol
  ChemDraw01201408352D

 27 29  0  0  0  0  0  0  0  0999 V2000
   -0.6085   -0.0420    0.0000 C   0  0  0  0  0  0  0  0  0  0  0  0
   -0.6085   -0.8670    0.0000 C   0  0  0  0  0  0  0  0  0  0  0  0
    0.1762   -1.1220    0.0000 O   0  0  0  0  0  0  0  0  0  0  0  0
    0.6611   -0.4545    0.0000 C   0  0  0  0  0  0  0  0  0  0  0  0
    0.1762    0.2129    0.0000 C   0  0  0  0  0  0  0  0  0  0  0  0
   -1.3931    0.2129    0.0000 C   0  0  0  0  0  0  0  0  0  0  0  0
   -1.8780   -0.4545    0.0000 C   0  0  0  0  0  0  0  0  0  0  0  0
   -1.3931   -1.1220    0.0000 C   0  0  0  0  0  0  0  0  0  0  0  0
   -1.3931    1.0379    0.0000 C   0  0  0  0  0  0  0  0  0  0  0  0
   -0.5962    1.2514    0.0000 O   0  0  0  0  0  0  0  0  0  0  0  0
   -2.1076    1.4504    0.0000 C   0  0  0  0  0  0  0  0  0  0  0  0
   -0.6085   -1.6920    0.0000 C   0  0  0  0  0  0  0  0  0  0  0  0
    0.8906    0.6254    0.0000 C   0  0  0  0  0  0  0  0  0  0  0  0
   -2.1076    0.6254    0.0000 H   0  0  0  0  0  0  0  0  0  0  0  0
   -2.5925   -0.0420    0.0000 C   0  0  0  0  0  0  0  0  0  0  0  0
   -3.3069   -0.4545    0.0000 C   0  0  0  0  0  0  0  0  0  0  0  0
   -0.0251   -2.2754    0.0000 C   0  0  0  0  0  0  0  0  0  0  0  0
    1.1042    1.4223    0.0000 C   0  0  0  0  0  0  0  0  0  0  0  0
   -0.6440    0.5822    0.0000 H   0  0  0  0  0  0  0  0  0  0  0  0
    1.4861   -0.4545    0.0000 C   0  0  0  0  0  0  0  0  0  0  0  0
    1.8986   -1.1690    0.0000 C   0  0  0  0  0  0  0  0  0  0  0  0
    2.7236   -1.1690    0.0000 O   0  0  0  0  0  0  0  0  0  0  0  0
    3.3069   -1.7524    0.0000 C   0  0  0  0  0  0  0  0  0  0  0  0
    1.4861   -1.8835    0.0000 O   0  0  0  0  0  0  0  0  0  0  0  0
   -2.8220    1.0379    0.0000 C   0  0  0  0  0  0  0  0  0  0  0  0
   -2.1076    2.2754    0.0000 O   0  0  0  0  0  0  0  0  0  0  0  0
   -2.4614   -1.0379    0.0000 O   0  0  0  0  0  0  0  0  0  0  0  0
  1  2  1  0      
  2  3  1  0      
  3  4  1  0      
  4  5  1  0      
  5  1  1  0      
  1  6  1  0      
  6  7  1  0      
  7  8  1  0      
  8  2  1  0      
  6  9  1  0      
  9 11  1  0      
  5 10  1  6      
  2 12  1  1      
  5 13  1  1      
  6 14  1  1      
  7 15  1  1      
 15 16  1  0      
 12 17  1  0      
 13 18  1  0      
  1 19  1  1      
  4 20  2  0      
 20 21  1  0      
 21 22  1  0      
 22 23  1  0      
 21 24  2  0      
  9 10  1  6      
 11 25  1  0      
 11 26  1  6      
  7 27  1  6      
M  END
