# Supplementary material for: Oxygenated Polyketides from Plakinastrella mamillaris as a New Chemotype of PXR Agonists
Source: MDPI journal article supplement (doi:10.3390/md11072314), 2013-07-02
Supplement: s7 [file s7]

marinedrugs-11-02314-s004.mol
  corina  04141405273D 1   1.00000     0.00000 
CORINA 3.49 0023  12.04.2013
 21 23  0  0  0  0  0  0  0  0999 V2000
   -0.0188    1.5355    0.0105 C   0  0  0  0  0  0  0  0  0  0  0  0
    0.0021   -0.0041    0.0020 C   0  0  0  0  0  0  0  0  0  0  0  0
    1.3596   -0.3728    0.3838 O   0  0  0  0  0  0  0  0  0  0  0  0
    2.2069    0.5841   -0.0277 C   0  0  0  0  0  0  0  0  0  0  0  0
    1.4840    1.9184   -0.0018 C   0  0  0  0  0  0  0  0  0  0  0  0
   -0.5340    1.9892   -1.3776 C   0  0  0  0  0  0  0  0  0  0  0  0
   -0.2917    0.7963   -2.3171 C   0  0  0  0  0  0  0  0  0  0  0  0
   -0.2762   -0.4590   -1.4346 C   0  0  0  0  0  0  0  0  0  0  0  0
    0.4825    3.1051   -1.7355 C   0  0  0  0  0  0  0  0  0  0  0  0
    1.7373    2.5856   -1.2521 O   0  0  0  0  0  0  0  0  0  0  0  0
    0.5358    3.3198   -3.2495 C   0  0  0  0  0  0  0  0  0  0  0  0
   -1.0229   -0.5774    0.9826 C   0  0  0  0  0  0  0  0  0  0  0  0
    1.8748    2.7622    1.2132 C   0  0  0  0  0  0  0  0  0  0  0  0
   -1.5717    2.3226   -1.3670 H   0  0  0  0  0  0  0  0  0  0  0  0
   -1.4209    0.7007   -3.3450 C   0  0  0  0  0  0  0  0  0  0  0  0
   -1.1047   -0.4106   -4.3480 C   0  0  0  0  0  0  0  0  0  0  0  0
   -0.9683   -2.1059    0.9419 C   0  0  0  0  0  0  0  0  0  0  0  0
    3.3753    3.0579    1.1675 C   0  0  0  0  0  0  0  0  0  0  0  0
   -0.5708    1.9587    0.8498 H   0  0  0  0  0  0  0  0  0  0  0  0
    1.4495    4.5059   -3.5646 C   0  0  0  0  0  0  0  0  0  0  0  0
    3.3548    0.4115   -0.3631 O   0  0  0  0  0  0  0  0  0  0  0  0
  1  2  1  0      
  2  3  1  0      
  3  4  1  0      
  4  5  1  0      
  5  1  1  0      
  1  6  1  0      
  6  7  1  0      
  7  8  1  0      
  8  2  1  0      
  6  9  1  0      
  9 11  1  0      
  5 10  1  0      
  2 12  1  0      
  5 13  1  0      
  6 14  1  0      
  7 15  1  0      
 15 16  1  0      
 12 17  1  0      
 13 18  1  0      
  1 19  1  0      
  9 10  1  0      
 11 20  1  0      
  4 21  2  0      
M  END
$$$$
