# Supplementary material for: Oxygenated Polyketides from Plakinastrella mamillaris as a New Chemotype of PXR Agonists
Source: MDPI journal article supplement (doi:10.3390/md11072314), 2013-07-02
Supplement: s8 [file s8]

marinedrugs-11-02314-s004.mol
  ChemDraw01201408352D

 21 23  0  0  0  0  0  0  0  0999 V2000
    0.3160    0.3705    0.0000 C   0  0  0  0  0  0  0  0  0  0  0  0
    0.3160   -0.4545    0.0000 C   0  0  0  0  0  0  0  0  0  0  0  0
    1.1006   -0.7095    0.0000 O   0  0  0  0  0  0  0  0  0  0  0  0
    1.5856   -0.0420    0.0000 C   0  0  0  0  0  0  0  0  0  0  0  0
    1.1006    0.6254    0.0000 C   0  0  0  0  0  0  0  0  0  0  0  0
   -0.4686    0.6254    0.0000 C   0  0  0  0  0  0  0  0  0  0  0  0
   -0.9535   -0.0420    0.0000 C   0  0  0  0  0  0  0  0  0  0  0  0
   -0.4686   -0.7095    0.0000 C   0  0  0  0  0  0  0  0  0  0  0  0
   -0.4686    1.4504    0.0000 C   0  0  0  0  0  0  0  0  0  0  0  0
    0.3283    1.6639    0.0000 O   0  0  0  0  0  0  0  0  0  0  0  0
   -1.1831    1.8629    0.0000 C   0  0  0  0  0  0  0  0  0  0  0  0
    0.3160   -1.2795    0.0000 C   0  0  0  0  0  0  0  0  0  0  0  0
    1.8151    1.0379    0.0000 C   0  0  0  0  0  0  0  0  0  0  0  0
   -1.1831    1.0379    0.0000 H   0  0  0  0  0  0  0  0  0  0  0  0
   -1.6680    0.3705    0.0000 C   0  0  0  0  0  0  0  0  0  0  0  0
   -2.3825   -0.0420    0.0000 C   0  0  0  0  0  0  0  0  0  0  0  0
    0.8994   -1.8629    0.0000 C   0  0  0  0  0  0  0  0  0  0  0  0
    2.0286    1.8348    0.0000 C   0  0  0  0  0  0  0  0  0  0  0  0
    0.2805    0.9947    0.0000 H   0  0  0  0  0  0  0  0  0  0  0  0
   -1.8975    1.4504    0.0000 C   0  0  0  0  0  0  0  0  0  0  0  0
    2.3825   -0.2556    0.0000 O   0  0  0  0  0  0  0  0  0  0  0  0
  1  2  1  0      
  2  3  1  0      
  3  4  1  0      
  4  5  1  0      
  5  1  1  0      
  1  6  1  0      
  6  7  1  0      
  7  8  1  0      
  8  2  1  0      
  6  9  1  0      
  9 11  1  0      
  5 10  1  6      
  2 12  1  1      
  5 13  1  1      
  6 14  1  1      
  7 15  1  1      
 15 16  1  0      
 12 17  1  0      
 13 18  1  0      
  1 19  1  1      
  9 10  1  6      
 11 20  1  0      
  4 21  2  0      
M  END
