# Supplementary material for: Oxygenated Polyketides from Plakinastrella mamillaris as a New Chemotype of PXR Agonists
Source: MDPI journal article supplement (doi:10.3390/md11072314), 2013-07-02
Supplement: s9 [file s9]

marinedrugs-11-02314-s005.mol
  corina  04141405273D 1   1.00000     0.00000 
CORINA 3.49 0023  12.04.2013
 22 23  0  0  0  0  0  0  0  0999 V2000
    0.0747    1.3300    0.0655 C   0  0  0  0  0  0  0  0  0  0  0  0
    0.3378   -0.1964   -0.0512 C   0  0  0  0  0  0  0  0  0  0  0  0
    1.5868   -0.2891   -0.7959 O   0  0  0  0  0  0  0  0  0  0  0  0
    2.3621    0.7767   -0.5203 C   0  0  0  0  0  0  0  0  0  0  0  0
    1.5075    1.9058    0.0129 C   0  0  0  0  0  0  0  0  0  0  0  0
   -0.6652    1.7200   -1.2231 C   0  0  0  0  0  0  0  0  0  0  0  0
   -1.2269    0.4304   -1.8377 C   0  0  0  0  0  0  0  0  0  0  0  0
   -0.8195   -0.7275   -0.9139 C   0  0  0  0  0  0  0  0  0  0  0  0
    3.6953    0.8298   -0.6929 C   0  0  0  0  0  0  0  0  0  0  0  0
    4.4039   -0.3287   -1.0927 C   0  0  0  0  0  0  0  0  0  0  0  0
    5.7410   -0.2755   -1.2658 O   0  0  0  0  0  0  0  0  0  0  0  0
    6.3913   -1.4821   -1.6699 C   0  0  0  0  0  0  0  0  0  0  0  0
    3.8073   -1.3723   -1.2801 O   0  0  0  0  0  0  0  0  0  0  0  0
    0.4223   -0.8822    1.3138 C   0  0  0  0  0  0  0  0  0  0  0  0
    1.9711    2.3078    1.4145 C   0  0  0  0  0  0  0  0  0  0  0  0
   -2.7520    0.5159   -1.9238 C   0  0  0  0  0  0  0  0  0  0  0  0
   -3.2919   -0.7179   -2.6498 C   0  0  0  0  0  0  0  0  0  0  0  0
    0.6819   -2.3772    1.1183 C   0  0  0  0  0  0  0  0  0  0  0  0
    1.1054    3.4605    1.9269 C   0  0  0  0  0  0  0  0  0  0  0  0
   -0.4616    1.6042    0.9740 H   0  0  0  0  0  0  0  0  0  0  0  0
    1.5598    3.0282   -0.8699 O   0  0  0  0  0  0  0  0  0  0  0  0
    0.2435    2.3376   -2.1368 O   0  0  0  0  0  0  0  0  0  0  0  0
  1  2  1  0      
  2  3  1  0      
  3  4  1  0      
  4  5  1  0      
  5  1  1  0      
  1  6  1  0      
  6  7  1  0      
  7  8  1  0      
  8  2  1  0      
  4  9  2  0      
  9 10  1  0      
 10 11  1  0      
 11 12  1  0      
 10 13  2  0      
  2 14  1  0      
  5 15  1  0      
  7 16  1  0      
 16 17  1  0      
 14 18  1  0      
 15 19  1  0      
  1 20  1  0      
  5 21  1  0      
  6 22  1  0      
M  END
$$$$
