# Supplementary material for: Oxygenated Polyketides from Plakinastrella mamillaris as a New Chemotype of PXR Agonists
Source: MDPI journal article supplement (doi:10.3390/md11072314), 2013-07-02
Supplement: s10 [file s10]

marinedrugs-11-02314-s005.mol
  ChemDraw01201408362D

 22 23  0  0  0  0  0  0  0  0999 V2000
   -0.6085    0.3845    0.0000 C   0  0  0  0  0  0  0  0  0  0  0  0
   -0.6085   -0.4405    0.0000 C   0  0  0  0  0  0  0  0  0  0  0  0
    0.1762   -0.6954    0.0000 O   0  0  0  0  0  0  0  0  0  0  0  0
    0.6611   -0.0280    0.0000 C   0  0  0  0  0  0  0  0  0  0  0  0
    0.1762    0.6395    0.0000 C   0  0  0  0  0  0  0  0  0  0  0  0
   -1.3931    0.6395    0.0000 C   0  0  0  0  0  0  0  0  0  0  0  0
   -1.8780   -0.0280    0.0000 C   0  0  0  0  0  0  0  0  0  0  0  0
   -1.3931   -0.6954    0.0000 C   0  0  0  0  0  0  0  0  0  0  0  0
    1.4861   -0.0280    0.0000 C   0  0  0  0  0  0  0  0  0  0  0  0
    1.8986   -0.7425    0.0000 C   0  0  0  0  0  0  0  0  0  0  0  0
    2.7236   -0.7425    0.0000 O   0  0  0  0  0  0  0  0  0  0  0  0
    3.3069   -1.3258    0.0000 C   0  0  0  0  0  0  0  0  0  0  0  0
    1.4861   -1.4569    0.0000 O   0  0  0  0  0  0  0  0  0  0  0  0
   -0.6085   -1.2655    0.0000 C   0  0  0  0  0  0  0  0  0  0  0  0
    0.8906    1.0520    0.0000 C   0  0  0  0  0  0  0  0  0  0  0  0
   -2.5925    0.3845    0.0000 C   0  0  0  0  0  0  0  0  0  0  0  0
   -3.3069   -0.0280    0.0000 C   0  0  0  0  0  0  0  0  0  0  0  0
   -0.0251   -1.8488    0.0000 C   0  0  0  0  0  0  0  0  0  0  0  0
    1.1042    1.8488    0.0000 C   0  0  0  0  0  0  0  0  0  0  0  0
   -0.6440    1.0088    0.0000 H   0  0  0  0  0  0  0  0  0  0  0  0
    0.1762    1.4645    0.0000 O   0  0  0  0  0  0  0  0  0  0  0  0
   -1.8056    1.3539    0.0000 O   0  0  0  0  0  0  0  0  0  0  0  0
  1  2  1  0      
  2  3  1  0      
  3  4  1  0      
  4  5  1  0      
  5  1  1  0      
  1  6  1  0      
  6  7  1  0      
  7  8  1  0      
  8  2  1  0      
  4  9  2  0      
  9 10  1  0      
 10 11  1  0      
 11 12  1  0      
 10 13  2  0      
  2 14  1  1      
  5 15  1  1      
  7 16  1  1      
 16 17  1  0      
 14 18  1  0      
 15 19  1  0      
  1 20  1  1      
  5 21  1  6      
  6 22  1  6      
M  END
