# Supplementary material for: Oxygenated Polyketides from Plakinastrella mamillaris as a New Chemotype of PXR Agonists
Source: MDPI journal article supplement (doi:10.3390/md11072314), 2013-07-02
Supplement: s11 [file s11]

marinedrugs-11-02314-s006.mol
  corina  04141405273D 1   1.00000     0.00000 
CORINA 3.49 0023  12.04.2013
 27 30  0  0  0  0  0  0  0  0999 V2000
    0.0435    1.4674    0.0987 C   0  0  0  0  0  0  0  0  0  0  0  0
   -0.0585   -0.0720    0.2619 C   0  0  0  0  0  0  0  0  0  0  0  0
    0.1220   -0.3577    1.6528 O   0  0  0  0  0  0  0  0  0  0  0  0
    0.3589    0.8519    2.3830 C   0  0  0  0  0  0  0  0  0  0  0  0
    1.5719    1.7578    0.0107 C   0  0  0  0  0  0  0  0  0  0  0  0
    2.2801    0.3923   -0.0965 C   0  0  0  0  0  0  0  0  0  0  0  0
    1.1710   -0.5993   -0.5194 C   0  0  0  0  0  0  0  0  0  0  0  0
   -0.1645    0.7828    3.8190 C   0  0  0  0  0  0  0  0  0  0  0  0
    0.5720   -0.2958    4.5708 C   0  0  0  0  0  0  0  0  0  0  0  0
    0.2774   -0.5377    5.8578 O   0  0  0  0  0  0  0  0  0  0  0  0
    1.0268   -1.5911    6.5189 C   0  0  0  0  0  0  0  0  0  0  0  0
    1.4278   -0.9429    4.0150 O   0  0  0  0  0  0  0  0  0  0  0  0
   -1.3836   -0.6220   -0.2694 C   0  0  0  0  0  0  0  0  0  0  0  0
    3.3798    0.4452   -1.1590 C   0  0  0  0  0  0  0  0  0  0  0  0
    4.1500   -0.8768   -1.1622 C   0  0  0  0  0  0  0  0  0  0  0  0
   -1.4189   -2.1397   -0.0787 C   0  0  0  0  0  0  0  0  0  0  0  0
   -0.5531    1.8858   -0.7120 H   0  0  0  0  0  0  0  0  0  0  0  0
    1.8764    2.3210    1.4346 C   0  0  0  0  0  0  0  0  0  0  0  0
    3.1728    3.1250    1.5524 C   0  0  0  0  0  0  0  0  0  0  0  0
    3.2801    3.7164    2.9594 C   0  0  0  0  0  0  0  0  0  0  0  0
    1.7665    1.1732    2.3194 O   0  0  0  0  0  0  0  0  0  0  0  0
    0.6522    3.0644    1.7223 O   0  0  0  0  0  0  0  0  0  0  0  0
   -0.3105    1.9809    1.5351 C   0  0  0  0  0  0  0  0  0  0  0  0
   -1.7770    2.2995    1.8329 C   0  0  0  0  0  0  0  0  0  0  0  0
   -2.2615    3.4014    0.8885 C   0  0  0  0  0  0  0  0  0  0  0  0
    1.8344    2.4394   -0.7984 H   0  0  0  0  0  0  0  0  0  0  0  0
    3.1670    4.1818    0.5906 O   0  0  0  0  0  0  0  0  0  0  0  0
  1  2  1  0      
  2  3  1  0      
  3  4  1  0      
  1  5  1  0      
  5  6  1  0      
  6  7  1  0      
  7  2  1  0      
  8  9  1  0      
  9 10  1  0      
 10 11  1  0      
  9 12  2  0      
  2 13  1  0      
  6 14  1  0      
 14 15  1  0      
 13 16  1  0      
  1 17  1  0      
  5 18  1  0      
 18 19  1  0      
 19 20  1  0      
 18 21  1  0      
  4 21  1  0      
  4 23  1  0      
 18 22  1  0      
 22 23  1  0      
  4  8  1  0      
  1 23  1  0      
 23 24  1  0      
 24 25  1  0      
  5 26  1  0      
 19 27  1  0      
M  END
$$$$
