# Supplementary material for: Oxygenated Polyketides from Plakinastrella mamillaris as a New Chemotype of PXR Agonists
Source: MDPI journal article supplement (doi:10.3390/md11072314), 2013-07-02
Supplement: s12 [file s12]

marinedrugs-11-02314-s006.mol
  ChemDraw01201408362D

 27 30  0  0  0  0  0  0  0  0999 V2000
   -0.6085   -0.0420    0.0000 C   0  0  0  0  0  0  0  0  0  0  0  0
   -0.6085   -0.8670    0.0000 C   0  0  0  0  0  0  0  0  0  0  0  0
    0.1762   -1.1220    0.0000 O   0  0  0  0  0  0  0  0  0  0  0  0
    0.6611   -0.4545    0.0000 C   0  0  0  0  0  0  0  0  0  0  0  0
   -1.3931    0.2129    0.0000 C   0  0  0  0  0  0  0  0  0  0  0  0
   -1.8780   -0.4545    0.0000 C   0  0  0  0  0  0  0  0  0  0  0  0
   -1.3931   -1.1220    0.0000 C   0  0  0  0  0  0  0  0  0  0  0  0
    1.4861   -0.4545    0.0000 C   0  0  0  0  0  0  0  0  0  0  0  0
    1.8986   -1.1690    0.0000 C   0  0  0  0  0  0  0  0  0  0  0  0
    2.7236   -1.1690    0.0000 O   0  0  0  0  0  0  0  0  0  0  0  0
    3.3069   -1.7524    0.0000 C   0  0  0  0  0  0  0  0  0  0  0  0
    1.4861   -1.8835    0.0000 O   0  0  0  0  0  0  0  0  0  0  0  0
   -0.6085   -1.6920    0.0000 C   0  0  0  0  0  0  0  0  0  0  0  0
   -2.5925   -0.0420    0.0000 C   0  0  0  0  0  0  0  0  0  0  0  0
   -3.3069   -0.4545    0.0000 C   0  0  0  0  0  0  0  0  0  0  0  0
   -0.0251   -2.2754    0.0000 C   0  0  0  0  0  0  0  0  0  0  0  0
   -0.6440    0.5822    0.0000 H   0  0  0  0  0  0  0  0  0  0  0  0
   -1.3931    1.0379    0.0000 C   0  0  0  0  0  0  0  0  0  0  0  0
   -2.1076    1.4504    0.0000 C   0  0  0  0  0  0  0  0  0  0  0  0
   -2.8220    1.0379    0.0000 C   0  0  0  0  0  0  0  0  0  0  0  0
   -0.0407    0.8242    0.0000 O   0  0  0  0  0  0  0  0  0  0  0  0
    0.1501    1.2628    0.0000 O   0  0  0  0  0  0  0  0  0  0  0  0
    0.6611    0.3705    0.0000 C   0  0  0  0  0  0  0  0  0  0  0  0
    1.3756    0.7830    0.0000 C   0  0  0  0  0  0  0  0  0  0  0  0
    1.7881    1.4974    0.0000 C   0  0  0  0  0  0  0  0  0  0  0  0
   -2.1076    0.6254    0.0000 H   0  0  0  0  0  0  0  0  0  0  0  0
   -2.1076    2.2754    0.0000 O   0  0  0  0  0  0  0  0  0  0  0  0
  1  2  1  0      
  2  3  1  0      
  3  4  1  0      
  1  5  1  0      
  5  6  1  0      
  6  7  1  0      
  7  2  1  0      
  8  9  1  0      
  9 10  1  0      
 10 11  1  0      
  9 12  2  0      
  2 13  1  1      
  6 14  1  1      
 14 15  1  0      
 13 16  1  0      
  1 17  1  1      
  5 18  1  0      
 18 19  1  0      
 19 20  1  0      
 18 21  1  6      
  4 21  1  6      
  4 23  1  0      
 18 22  1  1      
 22 23  1  0      
  4  8  1  1      
  1 23  1  0      
 23 24  1  1      
 24 25  1  0      
  5 26  1  1      
 19 27  1  6      
M  END
